# Supplementary material for: Developing a seminar curriculum for the Competence Center for General Practice in Baden-Wuerttemberg – a progress report
Source: PubMed Central journal article supplement (PMC7958914; doi:10.3205/zma001432), 2021-02-15
Supplement: JME-38-2-36-s-001.pdf [file JME-38-2-36-s-001.pdf]

Attachment 1: The desired topics mentioned in the written responses on the GP trainee evaluations of the Verbundweiterbildung<sup>plus</sup> /KWBW Verbundweiterbildung<sup>plus</sup>® (January 2013 – July 2018)

| Category: "Competency-based Curriculum General Practice" | n (total) | Topics                             | n  |
|----------------------------------------------------------|-----------|------------------------------------|----|
| Metabolism, Nutrition, Digestive system                  | 64        |                                    |    |
|                                                          |           | Diabetes mellitus                  | 34 |
| Cardiovascular system                                    | 25        |                                    |    |
| Respiratory organs and ear                               | 39        |                                    |    |
|                                                          |           | ENT                                | 20 |
| Musculoskeletal system, Pain, Injuries                   | 136       |                                    |    |
|                                                          |           | Orthopedics                        | 47 |
|                                                          |           | Back pain                          | 27 |
|                                                          |           | Wound care/Chronic wounds          | 44 |
| Eye and nervous system                                   | 43        |                                    |    |
|                                                          |           | Headaches                          | 10 |
|                                                          |           | Neurology                          | 15 |
|                                                          |           | Vertigo                            | 12 |
| Sexuality, Family planning, Sexual organs, Urinary tract | 32        |                                    |    |
|                                                          |           | Gynecology                         | 15 |
| Skin                                                     | 83        |                                    |    |
|                                                          |           | Dermatology                        | 70 |
|                                                          |           | Skin cancer screening              | 13 |
| Changes in consciousness, Cognition, Emotion             | 62        |                                    |    |
|                                                          |           | Addiction                          | 10 |
|                                                          |           | Depression/Psyche                  | 52 |
| Special aspects of children and adolescents              | 59        |                                    |    |
|                                                          |           | Pediatrics                         | 28 |
|                                                          |           | Immunizations                      | 31 |
| Caring for chronically ill and elderly patients          | 92        |                                    |    |
|                                                          |           | DMP (Disease Management Program)   | 14 |
|                                                          |           | Chronic pain                       | 13 |
|                                                          |           | The elderly patient                | 20 |
|                                                          |           | Polypharmacy/Medication monitoring | 28 |
| Palliative medicine                                      | 20        |                                    |    |
|                                                          |           | Palliative medicine                | 15 |
| Emergencies                                              | 34        |                                    |    |
|                                                          |           | Emergencies                        | 22 |
|                                                          |           | Pediatric emergencies              | 5  |
| Communication                                            | 23        |                                    |    |

Attachment 1 to: Stengel S, Förster C, Fuchs M, Bischoff M, Ledig T, Streitlein-Böhme I, Gulich M, Haumann H, Valentini J, Kohlhaas A, Graf von Luckner A, Reith D, Fehr F, Magez J, Eismann-Schwemmler J, Szecsenyi J, Joos S, Schwill S. Developing a seminar curriculum for the Competence Center for General Practice in Baden-Wuerttemberg – a progress report. GMS J Med Educ. 2021;38(2):Doc36. DOI: 10.3205/zma001432

|                                                                                       |                  |                                              |          |
|---------------------------------------------------------------------------------------|------------------|----------------------------------------------|----------|
|                                                                                       |                  | Communication skills training                | 10       |
|                                                                                       |                  | Communication with difficult patients        | 12       |
| <b>Category: "Competency-based Curriculum General Practice"</b>                       | <b>n (total)</b> | <b>Topics</b>                                | <b>n</b> |
| Collaboration                                                                         | 12               |                                              |          |
| Management                                                                            | 134              |                                              |          |
|                                                                                       |                  | Billing                                      | 54       |
|                                                                                       |                  | Now a specialist/taking up practice          | 23       |
|                                                                                       |                  | Practice organization                        | 34       |
|                                                                                       |                  | Practice software                            | 10       |
| Representing the patient: Guidance through the healthcare system and health promotion | 72               |                                              |          |
|                                                                                       |                  | Aids                                         | 11       |
|                                                                                       |                  | Social medicine                              | 28       |
|                                                                                       |                  | Medications and remedies                     | 19       |
| Learning and teaching                                                                 | 21               |                                              |          |
|                                                                                       |                  | How do I structure my postgraduate training? | 11       |
| Professionalism                                                                       | 38               |                                              |          |
|                                                                                       |                  | Law                                          | 17       |
| Procedures                                                                            | 135              |                                              |          |
|                                                                                       |                  | ECG (electrocardiogram)                      | 10       |
|                                                                                       |                  | Minor surgery                                | 10       |
|                                                                                       |                  | Complementary medicine                       | 15       |
|                                                                                       |                  | Orthopedic exam                              | 25       |
|                                                                                       |                  | Sonography                                   | 17       |
|                                                                                       |                  | Routine infant/adolescent checkups           | 15       |
| Miscellaneous                                                                         | 120              |                                              |          |
|                                                                                       |                  | Antibiotics                                  | 11       |
|                                                                                       |                  | Caring for asylum seekers                    | 10       |
|                                                                                       |                  | Nutritional medicine                         | 16       |
|                                                                                       |                  | Manual therapy                               | 10       |
|                                                                                       |                  | Preparation for specialist consultation      | 13       |
|                                                                                       |                  | Additional post-licensure training           | 16       |

**Note:** n= number of the desired topics mentioned. Listed are all topics which had been mentioned a minimum of 10 x during the time period.

**Method:** The topics desired by the attendees from the evaluation questionnaires from 2013 to 2018 in the Verbundweiterbildung<sup>plus</sup>/KWBW Verbundweiterbildung<sup>plus</sup>® postgraduate training program were categorized, assigned to the subject areas of the DEGAM Competency-based Curriculum General Practice, and the frequency of the mentions was calculated.
