# Supplementary material for: Developing a seminar curriculum for the Competence Center for General Practice in Baden-Wuerttemberg – a progress report
Source: PubMed Central journal article supplement (PMC7958914; doi:10.3205/zma001432), 2021-02-15
Supplement: JME-38-2-36-s-003.pdf [file JME-38-2-36-s-003.pdf]

Attachment 3: KWBW Verbundweiterbildung<sup>plus</sup>® basic curriculum with a sub-curriculum in practice management as a component of the overall curriculum (240 curricular units)

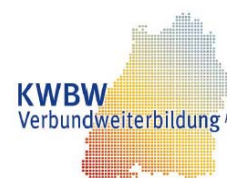

|                                                                                          |
|------------------------------------------------------------------------------------------|
| <b>KWBW Verbundweiterbildung<sup>plus</sup>® basic curriculum 124 units – 62 modules</b> |
|------------------------------------------------------------------------------------------|

| No.    | Module topics and single-seminar days                                                                                  |
|--------|------------------------------------------------------------------------------------------------------------------------|
| 1      | Diabetes mellitus - Part 1                                                                                             |
| 2      | Diabetes mellitus - Part 2                                                                                             |
| 3      | Colds, coughs, hoarseness – symptomatic treatment or antibiotics?                                                      |
| 4      | Dyspnea / coughing with focus on asthma with DMP <sup>1</sup>                                                          |
| 5      | Dyspnea / coughing with focus on COPD <sup>2</sup> with DMP <sup>1</sup>                                               |
| 6      | Complementary medicine                                                                                                 |
| 7      | Blind spot – e.g. sexually transmitted diseases (STD), sexual medicine                                                 |
| 8 +PM  | Back/neck pain with remedies - Part 1                                                                                  |
| 9 +PM  | Back/neck pain with remedies - Part 2                                                                                  |
| 10 +PM | Joint pain, muscle pain (without trauma) with aids                                                                     |
| 11     | Vertigo                                                                                                                |
| 12     | Urination complaints                                                                                                   |
| 13     | Skin - Part 1                                                                                                          |
| 14     | Skin - Part 2                                                                                                          |
| 15     | The acutely sick child/adolescent (who was always healthy before)                                                      |
| 16     | Long-term care of chronically ill children/adolescents                                                                 |
| 17     | Psychologically troubled children/adolescents                                                                          |
| 18     | Youth occupational safety checkups, preventive checkups for children and adolescents (U10-J2), including immunizations |
| 19     | Routine preventive checkups for children (U1 – U9)                                                                     |

Attachment 3 to: Stengel S, Förster C, Fuchs M, Bischoff M, Ledig T, Streitlein-Böhme I, Gulich M, Haumann H, Valentini J, Kohlhaas A, Graf von Luckner A, Reith D, Fehr F, Magez J, Eismann-Schwemmler J, Szecsenyi J, Joos S, Schwill S. Developing a seminar curriculum for the Competence Center for General Practice in Baden-Wuerttemberg – a progress report. GMS J Med Educ. 2021;38(2):Doc36. DOI: 10.3205/zma001432

|        |                                                                                                                         |
|--------|-------------------------------------------------------------------------------------------------------------------------|
| 20 +PM | Emergencies                                                                                                             |
| 21 PM  | Billing                                                                                                                 |
| 22 PM  | Physician as team leader / Team                                                                                         |
| 23 PM  | QM <sup>3</sup> – Risk and error management + GDPR <sup>4</sup> - Part 1                                                |
| 24 PM  | QM <sup>3</sup> + Risk and error management + GDPR <sup>4</sup> - Part 2                                                |
| 25 PM  | Social medicine, rehabilitation, benefits/entitlements, mother-child convalescent care, incapacity-to-work certificates |
| 26 PM  | Prescriptions/pharmaceutical guidelines                                                                                 |
| 27 PM  | Questions about immunization                                                                                            |
| 28 PM  | Association of Statutory Health Insurance (SHI) Physicians 1: Doctor's office                                           |
| 29 PM  | Association of SHI Physicians 2: Business management                                                                    |
| 30 PM  | Association of SHI Physicians 3: Billing                                                                                |
| 31 PM  | Association of SHI Physicians 4: Demand for consultation hours                                                          |
| 32 PM  | Association of SHI Physicians 5: Legal aspects                                                                          |

|            |                                                    |
|------------|----------------------------------------------------|
| <b>No.</b> | <b>Module topics for double-seminar days (DST)</b> |
|------------|----------------------------------------------------|

|            |                                                                                         |
|------------|-----------------------------------------------------------------------------------------|
| <b>No.</b> | <b>DST 1</b>                                                                            |
| 33         | Basic principles / Uncertainty                                                          |
| 34         | Inappropriate treatment, over/under treatment / evidence-based medicine                 |
| 35         | Headaches                                                                               |
| 36         | Attitude / professionalism                                                              |
| 37         | Chest pain – focus on coronary heart disease (Part 1)                                   |
| 38         | Chest pain –focus on coronary heart disease (Part 2) / Dyspnea – focus on heart failure |

|            |              |
|------------|--------------|
| <b>No.</b> | <b>DST 2</b> |
|------------|--------------|

Attachment 3 to: Stengel S, Förster C, Fuchs M, Bischoff M, Ledig T, Streitlein-Böhme I, Gulich M, Haumann H, Valentini J, Kohlhaas A, Graf von Luckner A, Reith D, Fehr F, Magez J, Eismann-Schwemmler J, Szecsenyi J, Joos S, Schwill S. Developing a seminar curriculum for the Competence Center for General Practice in Baden-Wuerttemberg – a progress report. GMS J Med Educ. 2021;38(2):Doc36. DOI: 10.3205/zma001432

|       |                                                               |
|-------|---------------------------------------------------------------|
| 39    | Care of chronically ill patients                              |
| 40 PM | Organization of care / delegation                             |
| 41    | Acute situations / decompensation in chronically ill patients |
| 42    | Care of elderly patients                                      |
| 43    | Polypharmacy / drug safety                                    |
| 44    | House visit with training                                     |

| No. | DST 3                                     |
|-----|-------------------------------------------|
| 45  | Abdominal pain, nausea, diarrhea - Part 1 |
| 46  | Abdominal pain, nausea, diarrhea - Part 2 |
| 47  | Abdominal pain, nausea, diarrhea - Part 3 |
| 48  | Injuries / wounds - Part 1                |
| 49  | Injuries / wounds - Part 2                |
| 50  | Injuries / wounds - Part 3                |

| No. | DST 4                                                                            |
|-----|----------------------------------------------------------------------------------|
| 51  | Palliative organization                                                          |
| 52  | Palliative symptoms including chronic pain therapy                               |
| 53  | Palliative adjuvant therapy (aromatherapy, wraps, etc.)                          |
| 54  | Prevention with arterial hypertension, hyperlipidemia, checkups, preventive care |
| 55  | ARRIBA / Informed shared decision making, communication skills training          |
| 56  | Palliative patient medical directives / organ donation                           |

| No. | DST 5                                                          |
|-----|----------------------------------------------------------------|
| 57  | Exhaustion / sleep disorders / mood swings / weakness - Part 1 |
| 58  | Exhaustion / sleep disorders / mood swings / weakness - Part 2 |
| 59  | Anxiety / panic                                                |

Attachment 3 to: Stengel S, Förster C, Fuchs M, Bischoff M, Ledig T, Streitlein-Böhme I, Gulich M, Haumann H, Valentini J, Kohlhaas A, Graf von Luckner A, Reith D, Fehr F, Magez J, Eismann-Schwemmler J, Szecsenyi J, Joos S, Schwill S. Developing a seminar curriculum for the Competence Center for General Practice in Baden-Wuerttemberg – a progress report. GMS J Med Educ. 2021;38(2):Doc36. DOI: 10.3205/zma001432

|    |                                                          |
|----|----------------------------------------------------------|
| 60 | Addiction                                                |
| 61 | Reflection (medical professionalism, physicians' health) |
| 62 | Communication skills training                            |

**Note** PM = practice management; +PM = medical/CanMEDS focus and relevant PM content; UE = curricular unit

<sup>1</sup>DMP = Disease Management Program; <sup>2</sup> COPD = Chronic Obstructive Pulmonary Disease; <sup>3</sup> QM = Quality Management; <sup>4</sup> GDPR = General Data Protection Regulation
